# Supplementary material
Source: PubMed Central journal article supplement (PMC3657614)
Supplement: NIHMS457261-supplement-supplementFigure.pdf [file NIHMS457261-supplement-supplementFigure.pdf]

**a**

|                 | p. A13T   | p. V67F  | p. V98G | p. V151F | p. W169X | p. R207W | p. R237L  | p. E257K | p. N273D |
|-----------------|-----------|----------|---------|----------|----------|----------|-----------|----------|----------|
| H. SAPIENS      | VVLLACGSF | YHRVIMAE | TLKVLRH | PKVKLLC  | PNLWKSED | WKHRSNIH | GQSIRYLVP | YSSESED  | PLQRNTA  |
| P. TROGLODYTES  | -----MF   | YHRVIMAE | TLKVLRH | PKVKLLC  | PNLWKSED | WKHRSNIH | GQSIRYLVP | YSSESED  | PLQRNTE  |
| C. LUPUS        | VVLLACGSF | HHRVIMAE | TAKVLRH | PKVKLLC  | PNLWKSED | WQHRSNIH | GQSIRYLVP | YSCSEEE  | PLQRNTA  |
| B. TAURUS       | VVLLACGSF | YHRVIMAE | TAKVLRH | PKVKLLC  | PNLWKSED | WKHQNNIH | GQSIRYLVP | YSCSEEE  | PLQRNTT  |
| M. MUSCULUS     | VVLLACGSF | HHRVIMAE | TVKVLRY | PKVKLLC  | PNLWKMED | WRHQSNIH | GQSIRYLVP | YNTSEEG  | PLQRNAA  |
| R. NORVEGICUS   | VVLLACGSF | HHRVIMAE | TVKVLRH | PQVKLLC  | PNLWKLED | WKYKNNIH | GQSIRYLVP | YSLESED  | PLQKNAS  |
| G. GALLUS       | VVLLACGSF | DHRVTMAK | TVKVLRH | PQVKLLC  | PNLWKLED | WKYKNNIH | GQSIRYLVP | YSLESED  | PLQKNAS  |
| X. TROPICALIS   | VVLLATGSF | SHRLAMAN | TVLVLRH | PQVKLLC  | PNLWKNEE | WKYKNNIH | GMSIRYLVP | YNERSEE  | PLARNSK  |
| M. DOMESTICA    | VVLLACGSF | CHRITMAE | TAKVLRY | PELKLLC  | PNLWKLED | WKYRSNIH | GHSIQYLP  | YSSESED  | PLQKITE  |
| D. RERIO        | LVLLACGSF | KHRLAMAR | TVVTMRY | PQLKLLC  | PGLWTDEH | SKHRPSIF | GHSVKYLLP | YTQDSEM  | PLTKQVI  |
| D. MELANOGASTER | LVLVACGSF | LDRCAMVK | TQAVLQH | VHLKLLC  | PGLWAEAD | TKYQSNTI | GQSVKYLLD | FNFKSRD  | S-----   |
| S. CEREVISIAE   | LIIVACGSF | YHRVRMCE | TAKVLDH | VKIMLLA  | PHYWADSD | YEHRRNIL | GMSVQYLLP | YINQSE-  | PVKQVLD  |

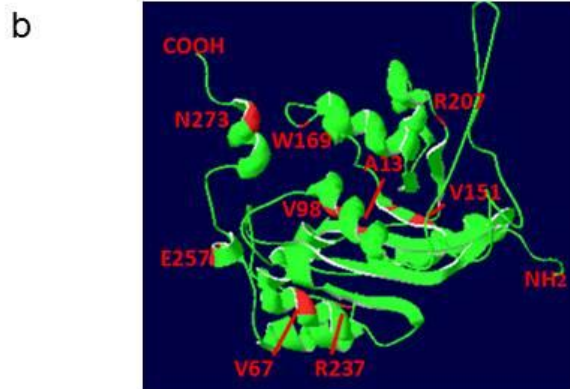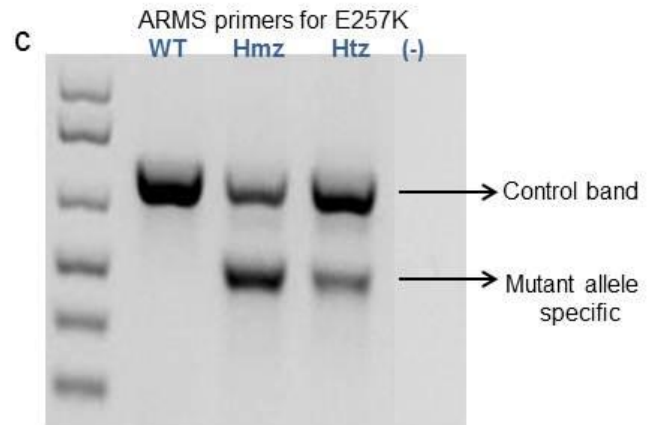

Supplementary Figure 1 Koenekoop *et al*

**Supplementary Figure 1 Summary of *NMNAT1* substitutions.** (a) The conservation of mutations across different species. (b) Crystal structure of *NMNAT1*. All variants found in LCA patients are indicated. (c) PCR experiment with ARMS primers to identify the p. Glu257Lys allele in *NMNAT1*. We developed ARMS primers and show here the WT and mutant alleles. Primers: flanking primers forward: CCCTCATCCTTGAAAAGCAC, reverse: TCCCAAAGTGCTGGGATTAC, allele specific primer: AGCATTCTGTCTTCACTCTT. Conditions are available upon request.

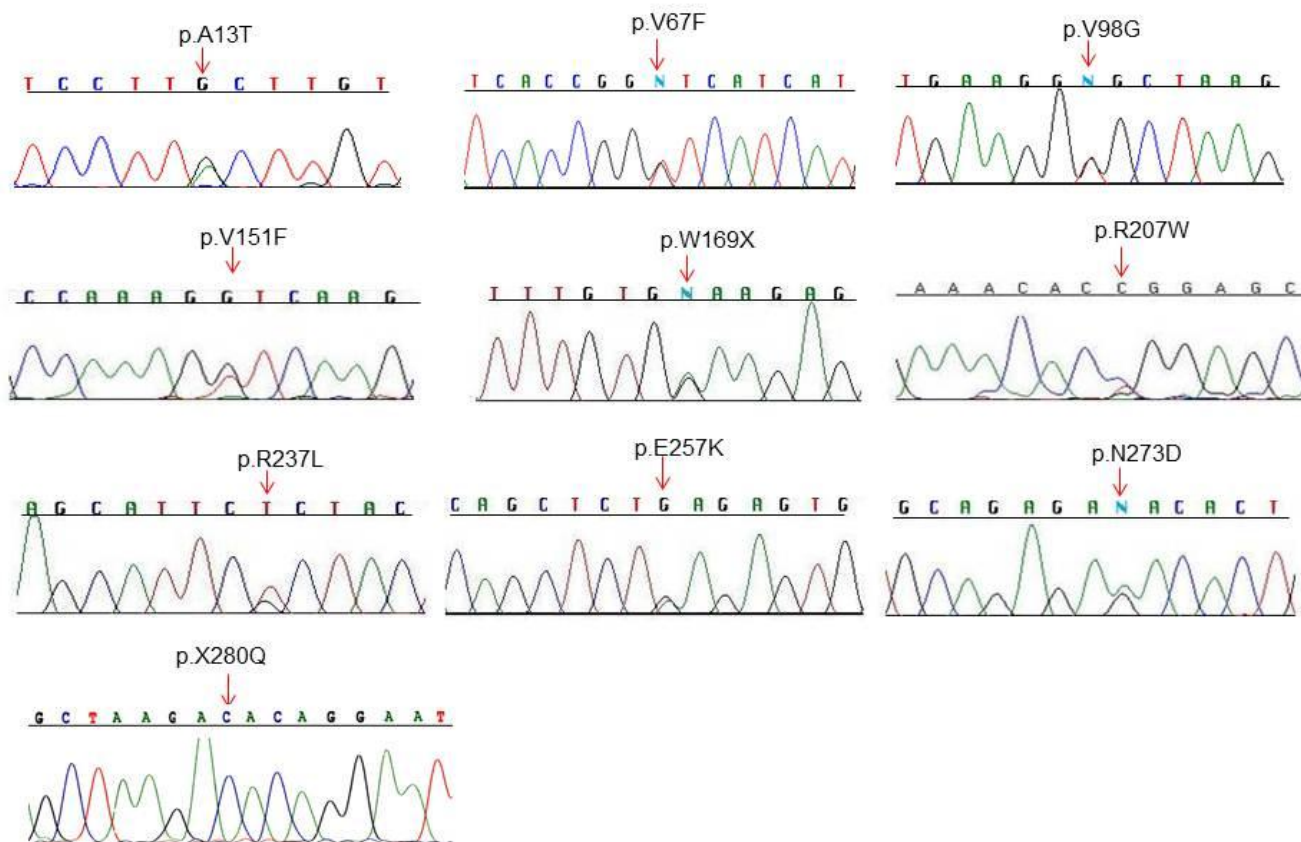

Supplementary Figure 2 Koenekoop *et al*

**Supplementary Figure 2 Sanger sequencing chromatograms showing all mutations found in this study.**

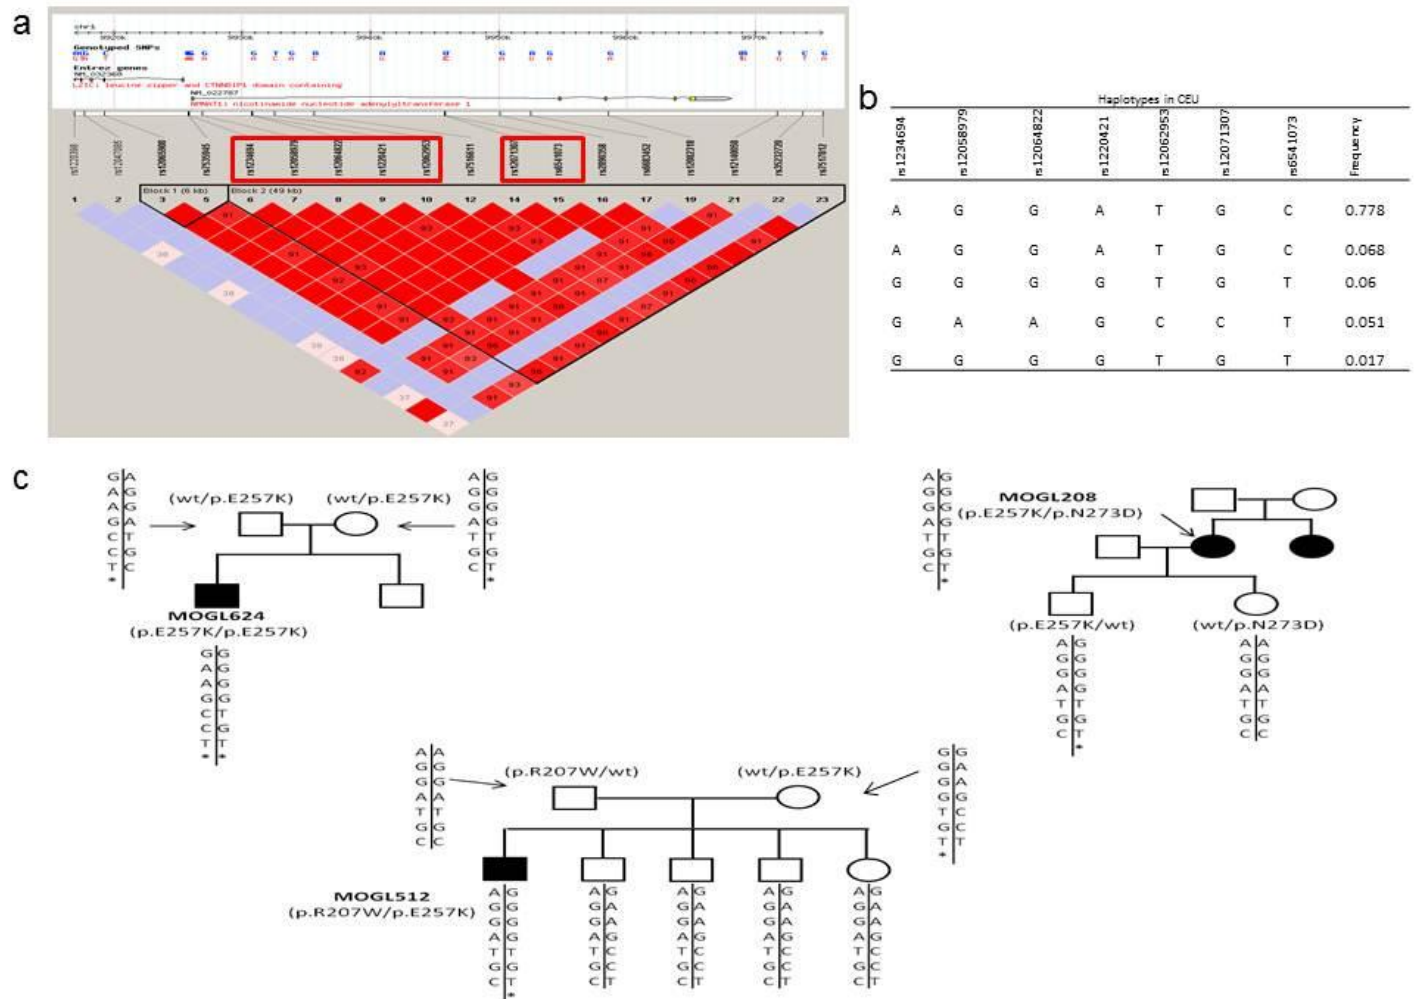

Supplementary Figure 3 Koenekoop *et al*

**Supplementary Figure 3 Haplotype analysis.** (a) A 49kb block from rs1234694 to rs7517812 covers the NMNAT1 gene in European ancestry population (CEU). To test whether the p. Glu257Lys mutation is in a common haplotype shared by the patients, we selected 7 tagging SNPs near the 5' of p. Glu257Lys for genotyping. The 3' tagging SNPs were not selected because the excess amount of repetitive elements near those tagSNPs would cause non-specific PCR products. rs6541073 is the closest SNP to Glu257Lys, about 19kb away. CEU: Utah residents (CEPH) with Northern and Western European ancestry. (b) The haplotypes and their frequency in CEU population are listed. (c) The mutation p. Glu257Lys is linked with the GGGGTGT haplotype in family 512, 208 and 624. SNP genotype for each genotyped individual

is listed from top to bottom according to the sequential order on the chromosome from 5' end to 3' end. SNPs are phased to each chromosome according to the pedigree information. \* represent the p. Glu257Lys mutation. Family 512 and 208 are French Canadian and family 624 is from Saudi Arabia. Family 512, 208 and 624 share the same GGGTGT haplotype carrying p. Glu257Lys mutation. It is worth to note that there are two haplotypes carrying p. Glu257Lys in family 624 from Saudi Arabia.

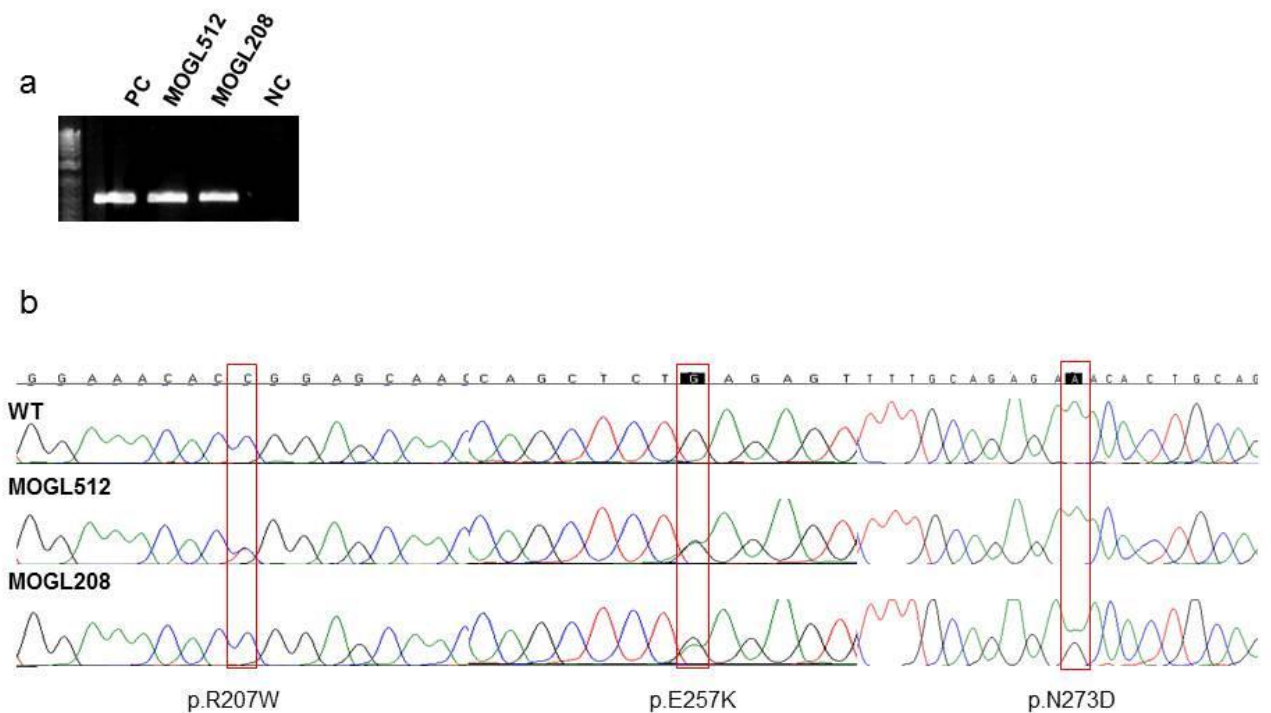

Supplementary Figure 4 Koenekoop *et al*

**Supplementary Figure 4 *NMNAT1* mutations do not affect transcription.** *NMNAT1* transcription is examined in the peripheral blood of patient MOGL 208 and 512. (a) *NMNAT1* mutant alleles are transcribed in patients. RT-PCR was carried out using total RNA extracted

from patient blood samples and the DNA band specific for *NMANT1* is present in both patients as well as positive controls (PC) using placenta RNA. The band is absent in the negative control without RNA template. (b) To further confirm that both alleles are transcribed, RT-PCR bands were purified and sequenced by Sanger sequencing. Sequencing chromatograms of wild type control as well as MOGL208 and MOGL512 are shown. Base pair positions corresponding to mutations carried by these two patients are highlighted by red boxes. Consistent with the genotype of each patient, both p.Arg207Trp and p. Glu257Lys alleles are present in transcripts from MOGL512 and p. Glu257Lys and p.Asn273Asp alleles are present in transcript from MOGL208.

**Supplementary Table 1 *In silico* analysis of *NMANT1* mutations.**

| Mutation | Protein Change | Polyphen          | Sift                    | GERP score | I-Mutant (Kcal/mol) | Mupro (Kcal/mol) | Blosu m |
|----------|----------------|-------------------|-------------------------|------------|---------------------|------------------|---------|
| c.37G>A  | p.Ala13 Thr    | possibly damaging | affect protein function | 3.92       | -0.78               | -1.02            | 0       |
| c.199G>T | p.Val67 Phe    | possibly damaging | affect protein function | -0.53      | -2.18               | -0.93            | -1      |
| c.293T>G | p.Val98 Gly    | possibly damaging | affect protein function | 4.93       | -1.22               | -2.22            | -3      |
| c.451G>T | p.Val151Phe    | possibly damaging | affect protein function | 2.04       | -2.32               | -1               | -1      |
| c.507G>A | p.Trp169Ter    | stop              | stop                    | 5.16       | N/A                 | N/A              |         |
| c.619C>T | p.Arg207Trp    | probably damaging | affect protein function | 2.95       | -1.16               | -1.3             | -3      |
| c.710G>T | p.Arg237Leu    | probably damaging | affect protein function | 3.1        | -0.27               | -1.03            | -2      |
| c.769G>A | p. Glu257Lys   | benign            | tolerated               | 5.01       | -1.14               | -1.49            | 1       |

|              |                     |                          |                               |      |       |       |   |
|--------------|---------------------|--------------------------|-------------------------------|------|-------|-------|---|
| c.817A><br>G | p.Asn27<br>3Asp     | possibly<br>damagin<br>g | tolerated                     | 3.79 | -0.45 | -1.23 | 1 |
| c.838T><br>C | p.<br>Ter280<br>Gln | read<br>through          | abnormal<br>protein<br>length | -    | -     | -     | - |

**Supplementary Table 2 RT-PCR primer sequence.**

| <b>Primer name</b> | <b>Sequence</b>       |
|--------------------|-----------------------|
| Forward primer     | tgactgtgatcaccagcagaa |
| Reverse primer     | cccaaatgggaagtctgaaa  |
